# Supplementary material for: Speed Effect Analysis Using the CFA Framework
Source: Front Psychol. 2019 Feb 14;10:239. doi: 10.3389/fpsyg.2019.00239 (PMC6382673; doi:10.3389/fpsyg.2019.00239)
Supplement: Supplementary file 3 [file Data_Sheet_2.ZIP › TetrachoricCorrelationsWithRidgeTransformation.txt]

1.10000
0.11801    1.10000
0.11222    0.29594    1.10000
0.05619   -0.02781    0.08538    1.10000
0.43500    0.12593    0.37299    0.38875    1.10000
0.17444    0.28928    0.39861    0.39989    0.51576    1.10000
0.22185    0.12474    0.17185    0.15363    0.46312    0.23194    1.10000
0.12364    0.33594    0.37768    0.37184    0.38515    0.68939    0.47690    1.10000
0.10853    0.11630    0.37444    0.10394    0.56970    0.42569    0.33062    0.66021    1.10000
0.25654    0.00317    0.09388    0.07381    0.37602    0.21699    0.28952    0.35663    0.33542    1.10000
0.07634    0.13058    0.04338    0.10162    0.06897    0.23699    0.22088    0.54078    0.42297    0.21763    1.10000
0.18877    0.08976    0.09700    0.06073    0.22680    0.15277    0.15361    0.44289    0.38258    0.30812    0.40626    1.10000
0.12361    0.06754    0.29314    0.12168    0.29225    0.50920    0.22242    0.46247    0.46680    0.23282    0.42262    0.37464    1.10000
0.11946    0.16445    0.19305    0.08877    0.33108    0.34120    0.07920    0.44440    0.32995    0.21075    0.35998    0.43887    0.56910    1.10000
0.00784    0.12604    0.06274   -0.01075    0.14037    0.22130    0.22265    0.36106    0.44980    0.22920    0.31985    0.41455    0.48006    0.58582    1.10000
0.12212    0.11788    0.09969    0.08719    0.33808    0.10695    0.17240    0.39454    0.26625    0.16107    0.13622    0.36331    0.45403    0.52401    0.81031    1.10000
0.08210    0.01530    0.07717    0.03312    0.13549    0.20329    0.20523    0.40759    0.25840    0.16205    0.17178    0.36173    0.44110    0.44418    0.72336    0.78392    1.10000
0.00783    0.06704   -0.00043    0.03542    0.16964    0.21560    0.07311    0.29178    0.21268    0.19504    0.18731    0.32279    0.41764    0.41268    0.72795    0.76409    0.90526    1.10000
0.06115    0.12683    0.15126    0.00376    0.14422    0.06194    0.18251    0.44558    0.28841    0.16262    0.05944    0.40108    0.27192    0.36414    0.63379    0.83534    0.81913    0.81780    1.10000
0.08966   -0.10176    0.05683    0.17232    0.16494    0.18140    0.08342    0.38146    0.16012    0.23957    0.20454    0.34527    0.25911    0.33194    0.48668    0.53751    0.72858    0.74269    0.75428    1.10000
